# Supplementary material for: Two metal–organic frameworks sharing the same basic framework show distinct interpenetration degrees and different performances in CO2 catalytic conversion
Source: Royal Society of Chemistry journal article supplement (doi:10.1039/c7ce00100b), 2017-01-01
Supplement: c7ce00100b1.pdf [file c7ce00100b1.pdf]

## Electronic Supplementary Information

# **Two metal-organic frameworks sharing the same basic framework show distinct interpenetration degrees and different performances in CO<sub>2</sub> catalytic conversion**

Pei-Zhou Li,<sup>†a</sup> Xiao-Jun Wang,<sup>†b</sup> Jia Liu,<sup>†a</sup> Jie Liang,<sup>a</sup> Jie Yi Jalyn Chen<sup>a</sup> and Yanli Zhao<sup>\*a,c</sup>

*<sup>a</sup>Division of Chemistry and Biological Chemistry, School of Physical and Mathematical Sciences, Nanyang Technological University, 21 Nanyang Link, 637371, Singapore, E-mail: zhaoyanli@ntu.edu.sg*

*<sup>b</sup>Jiangsu Key Laboratory of Green Synthetic Chemistry for Functional Materials, School of Chemistry and Chemical Engineering, Jiangsu Normal University, Xuzhou 221116, P. R. China.*

*<sup>c</sup>School of Materials Science and Engineering, Nanyang Technological University, 639798, Singapore*

† These authors contributed equally to this work.

\* Corresponding author.

## General information

All starting materials are commercially available and were used as received unless specifically mentioned: bis(triphenylphosphine)palladium(II) dichloride ( $\text{Pd}(\text{PPh}_3)_2\text{Cl}_2$ ,  $\geq 98\%$ , Sigma-Aldrich), *tert*-butyl 4-aminobenzoate ( $\geq 98\%$ , Sigma-Aldrich), copper(I) bromide ( $\text{CuBr}$ ,  $\geq 98\%$ , Sigma-Aldrich), copper(II) nitrate hemi(pentahydrate) ( $\text{Cu}(\text{NO}_3)_2 \cdot 2.5\text{H}_2\text{O}$ , 98%, Alfa Aesar), copper(II) sulphate pentahydrate ( $\text{CuSO}_4 \cdot 5\text{H}_2\text{O}$ , 99%, Alfa Aesar), diisopropyl amine (DIPA,  $\geq 99.5\%$ , Sigma-Aldrich), *N,N'*-dimehtylformamide (DMF, 99.8%, Sigma-Aldrich), hydrochloric acid (HCl, 37w%, MSR), sodium nitrite ( $\text{NaNO}_2$ ,  $\geq 97\%$ , Sigma-Aldrich), sodium *L*-ascorbate ( $\geq 98\%$ , Sigma-Aldrich), sodium azide ( $\text{NaN}_3$ ,  $\geq 99.5\%$ , Sigma-Aldrich), tetrakis(4-bromophenyl)methane ( $\geq 95\%$ , TCI), triphenylphosphine ( $\text{Ph}_3\text{P}$ ,  $\geq 98.5\%$ , Sigma-Aldrich), and (trimethylsilyl)acetylene (TMSA, 98%, Alfa Aesar).

$^1\text{H}$  NMR measurements were conducted on either a JEOL ECA400 NMR spectrometer or a JEOL ECA400 SL NMR spectrometer at ambient temperature. All  $^1\text{H}$  NMR spectra were reported as chemical shift  $\delta$  in units of parts per million (ppm) downfield with reference to deuterated solvent (2.50 ppm for  $\text{DMSO}-d_6$  and 7.26 ppm for  $\text{CDCl}_3$ ) or TMS (0.00 ppm). Multiplicities were presented as: s (singlet); d (doublet); t (triplet); and m (multiplet). Coupling constants  $J$  values were expressed in Hz and the number of protons was expressed as  $n\text{H}$ .  $^{13}\text{C}$  NMR spectra were obtained from a JEOL ECA400 NMR spectrometer at ambient temperature. Spectra were reported as chemical shift  $\delta$  in units of parts per million (ppm) downfield with reference to deuterated solvent (39.81 ppm for  $\text{DMSO}-d_6$  or 77.16 ppm for  $\text{CDCl}_3-d_1$ ). High resolution mass spectra (HRMS) or mass spectra (MS) were carried out on a Waters Q-tof Premier mass spectrometry. Melting point experiments were carried out on a SRS OptiMelt automated melting point system.

Single crystal X-ray diffraction measurements were performed on a SuperNova X-ray diffraction system from Agilent Technologies. Powder X-ray diffraction (PXRD) data were collected at 40 keV, 15 mA on a Rigaku MiniFlex 600 Benchtop diffractometer using  $\text{Cu-K}\alpha$  radiation ( $\lambda = 1.5418 \text{ \AA}$ ) over  $2\theta$  range of  $2.0^\circ - 40^\circ$  at room temperature. Thermogravimetric analyses (TGA) were carried out on a TGA-Q500 thermoanalyzer with a heating rate of  $10 \text{ }^\circ\text{C min}^{-1}$  under  $\text{N}_2$  flow (60 mL/min) from room temperature to  $700 \text{ }^\circ\text{C}$ . Gas sorption analyses were conducted using Quantachrome Instruments Autosorb-iQ (Boynton Beach, Florida USA) with extra-high pure gases.

## Experimental section

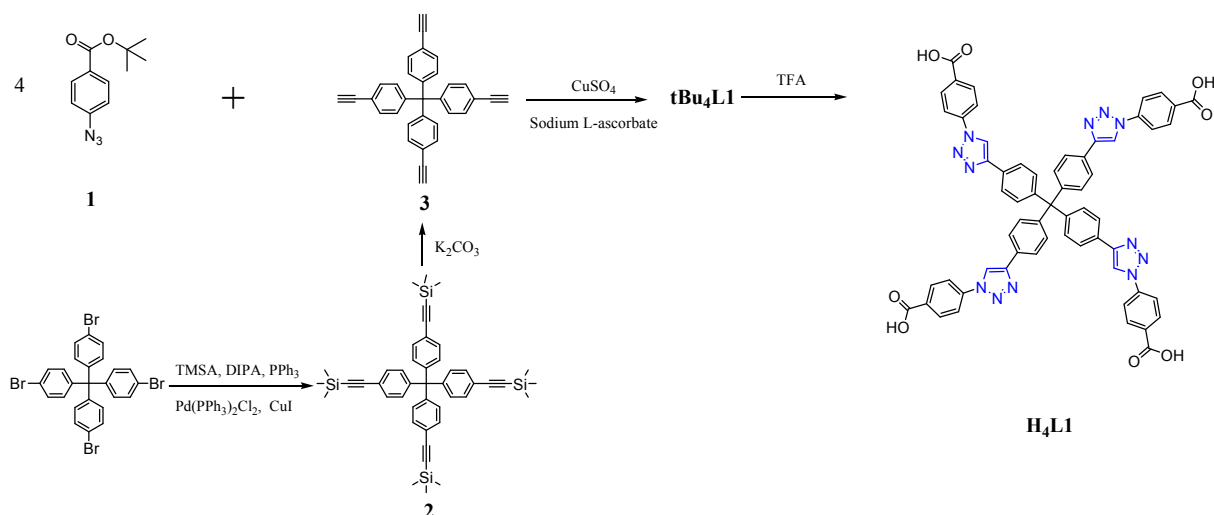

**Scheme S1.** Synthetic route for the preparation of ligand **H<sub>4</sub>L1**.

**tert-Butyl 4-azidobenzoate (1).** Compound **1** was synthesized in accordance to literature-reported method with slight modifications.<sup>S1,S2</sup> *tert*-Butyl 4-aminobenzoate (1.93 g, 10 mmol) was added into a mixture of MeOH (60 mL) and HCl (0.5 M, 60 mL) at 0 °C. Subsequently, a water solution of NaNO<sub>2</sub> (2.1 g, 30 mmol in 10 mL H<sub>2</sub>O) was slowly added into the above mixture, and the resulted mixture solution was stirred at 0 °C for 1.5 h. Then, a solution of NaN<sub>3</sub> (1.95 g, 30 mmol in 10 mL H<sub>2</sub>O) was slowly poured into the mixture solution at 0 °C with stirring for 2 hours, followed by extraction with CH<sub>2</sub>Cl<sub>2</sub> (50 mL × 2). The combined organic layers were dried over Na<sub>2</sub>SO<sub>4</sub> and the solvent was evaporated under vacuum. The crude product was purified by silica gel flash column chromatography (hexane/CH<sub>2</sub>Cl<sub>2</sub>, 100/20) to give compound **1** as a yellow liquid (2.11 g, 9.63 mmol, yield 96%). <sup>1</sup>H NMR (400 MHz, CDCl<sub>3</sub>) δ 7.97 (d, *J* = 8.8 Hz, 2H), 7.03 (d, *J* = 8.8 Hz, 2H), 1.57 (s, 9H). <sup>13</sup>C NMR (126 MHz, CDCl<sub>3</sub>) δ 165.1, 144.3, 131.3, 128.7, 118.7, 81.3, 28.3. FTIR (KBr)  $\nu/\text{cm}^{-1}$ : 2978.1(m), 2931.8(m), 2125.6(s), 2090.8(s), 1712.8(s), 1604.8(s), 1504.5(m), 1396.5(m), 1288.5(s), 1257.6(m), 1165.0(s), 1130.3(s), 1111.0(s), 1014.6(w), 852.5(m), 767.7(m), 690.5(w). ESI-TOF-HRMS: *m/z* calcd for C<sub>11</sub>H<sub>14</sub>N<sub>3</sub>O<sub>2</sub>: 220.1086, found: 220.1081 [M+H]<sup>+</sup>.

**Tetrakis(4((trimethylsilyl)ethynyl)phenyl)methane (2).** Compound **2** was synthesized according to literature-reported method with slight modifications.<sup>S1,S3</sup> Diisopropyl amine (15 mL) and trimethylsilyl acetylene (3.4 mL, 2.36 g, 2.40 mmol) were injected into a dried THF solution (50 mL) containing tetrakis(4-bromophenyl)methane (1.50 g, 2.36 mmol) and triphenylphosphine (62.4 mg, 0.24 mmol) under N<sub>2</sub> environment. Subsequently, bis(triphenylphosphine)palladium(II) dichloride (83.5 mg, 0.12 mmol) and copper(I) bromide (22.7 mg, 0.16 mmol) were added into the mixture solution under N<sub>2</sub> environment, and the resulted solution was subjected to reflux at 60°C for

20 hours. After cooling down to room temperature naturally, the insoluble substance was filtered out followed by CH<sub>2</sub>Cl<sub>2</sub> washing. The filtrate was then washed by water and then extracted with CH<sub>2</sub>Cl<sub>2</sub> (100 mL × 2). The combined organic layer was dried over Na<sub>2</sub>SO<sub>4</sub> and the solvent was evaporated under vacuum. The crude product was purified by flash column chromatography on silica gel using hexane as eluent to give compound **2** as a white solid (1.28 g, 1.81 mmol, yield: 77%, melting point: 343-344 °C). <sup>1</sup>H NMR (400 MHz, CDCl<sub>3</sub>): δ 7.32 (d, *J* = 8.5 Hz, 8H), 7.03 (d, *J* = 8.5 Hz, 8H), 0.23 (s, 36H). <sup>13</sup>C NMR (400MHz, CDCl<sub>3</sub>): 146.1, 131.4, 130.8, 121.3, 104.7, 94.8, 64.8, 0.0. FTIR (KBr) ν/cm<sup>-1</sup>: 3448.7(m), 2958.8(m), 2924.1(w), 2852.7(w), 2158.4(s) 1496.8(s), 1406.1(w), 1249.9(s), 1186.2(m), 1018.4(m), 866.0(s), 842.9(s), 810.1(s), 760.0(s), 700.2(w), 653.9(m), 640.4(m), 597.9(w). ESI-TOF-HRMS: *m/z* calculated for Mr of C<sub>45</sub>H<sub>53</sub>Si<sub>4</sub>: 705.3224, found: 705.3229 [M + H]<sup>+</sup>.

**Tetrakis(4-ethynylphenyl)methane (3)**. Potassium carbonate (K<sub>2</sub>CO<sub>3</sub>, 1.38 g, 10.00 mmol) was added into a DCM/MeOH (30 mL/30 mL) solution of compound **2** (1.2 g, 1.70 mmol), and then the mixture was stirred at room temperature overnight. The mixture solution was poured into water (50 mL) and extracted by CH<sub>2</sub>Cl<sub>2</sub> (50 mL × 2). The combined organic layer was dried over Na<sub>2</sub>SO<sub>4</sub> and the solvent was evaporated under vacuum. The crude product was purified by silica gel flash column chromatography (hexane/CH<sub>2</sub>Cl<sub>2</sub>, 100/10) to give **3** as a white solid (0.64 g, 1.54 mmol, yield: 90%, melting point: 333-334 °C). <sup>1</sup>H NMR (400MHz, CDCl<sub>3</sub>): 7.38 (d, *J* = 8.2 Hz, 8H), 7.11 (d, *J* = 8.2 Hz, 8H), 3.06 (s, 4H). <sup>13</sup>C NMR (400Hz, CDCl<sub>3</sub>): 146.3, 131.7, 130.8, 120.4, 83.3, 77.7, 64.9. FTIR (KBr) ν/cm<sup>-1</sup>: 3282.8(s), 3030.2(w), 2358.9(w), 2328.1(w), 2110.1(w), 1930.7(w), 1602.9(w), 1558.5(w), 1496.8(s), 1400.3(m), 1253.7(m), 1018.4(m), 825.5(s), 667.4(m), 640.4(m), 569.0(m), 559.4(m). ESI-TOF-HRMS: *m/z* calculated for Mr of C<sub>33</sub>H<sub>21</sub>: 417.1643, found: 417.1633 [M + H]<sup>+</sup>.

**Tetra-(tert-butyl) 4,4',4'',4'''-((methanetetrayltetrakis(benzene-4,1-diyl)) tetrakis (1*H*- 1,2,3-triazole-4,1-diyl))tetrabenzoate ('Bu<sub>4</sub>L1)**. 'Bu<sub>4</sub>L1 was synthesized in accordance to literature-reported method with slight modifications.<sup>S1,S2</sup> Above synthesized **1** (1.05 g, 4.80 mmol) and **3** (0.42 g, 1.00 mmol) were added into a mixture of THF/H<sub>2</sub>O (150 mL/50 mL). Then, CuSO<sub>4</sub>·5H<sub>2</sub>O (0.10 g, 0.40 mmol, 10 mL H<sub>2</sub>O) and excess sodium *L*-ascorbate (0.5 g, 2.5 mmol, 10 mL H<sub>2</sub>O) were added into the solution, and the mixture solution was stirred at 50 °C under N<sub>2</sub> for 3 days. The mixture solution was poured into water (50 mL) and then extracted by CH<sub>2</sub>Cl<sub>2</sub> (80 mL × 2). The combined organic layer was dried over Na<sub>2</sub>SO<sub>4</sub> and the solvent was evaporated under vacuum. The crude product was purified by silica gel flash column chromatography (CH<sub>2</sub>Cl<sub>2</sub>/EtOAc, 100/2) to give compound 'Bu<sub>4</sub>L1 as a light yellow solid (1.18 g, 0.91 mmol, yield: 91%, became black before

melting at above 270 °C). <sup>1</sup>H NMR (400MHz, DMSO-*d*<sub>6</sub>): 9.39 (s, 4H), 8.13 (d, *J* = 9.1 Hz, 8H), 8.10 (t, *J* = 9.1 Hz, 4H), 7.96 (d, *J* = 8.3 Hz, 8H), 7.48 (d, *J* = 8.3 Hz, 8H), 1.57 (s, 36H). <sup>13</sup>C NMR (400MHz, DMSO-*d*<sub>6</sub>): 164.6, 147.8, 146.8, 140.0, 131.6, 131.6, 131.4, 128.5, 125.7, 120.3, 120.2, 81.8, 64.9, 28.3. FTIR (KBr)  $\nu/\text{cm}^{-1}$ : 3456.4(m), 2976.2(m), 2931.8(m), 1708.9(s), 1608.6(s), 1558.5(m), 1518.0(m), 1489.1(m), 1440.8(m), 1408.0(m), 1392.6(m), 1369.5(m), 1294.2(s), 1255.7(m), 1228.7(m), 1163.1(s), 1120.6(s), 1031.9(m), 1018.4(m), 993.3(m), 858.3(m), 846.8(m), 829.4(m), 792.7(w), 769.6(m), 692.4(w). ESI-TOF-HRMS: *m/z* calculated for Mr of C<sub>77</sub>H<sub>73</sub>N<sub>12</sub>O<sub>8</sub>: 1293.5674, found: 1293.5679[M + H]<sup>+</sup>.

**4,4',4'',4'''-((Methanetetrayltetrakis(benzene-4,1-diyl)) tetrakis (1*H*-1,2,3-tri-azole-4,1-diyl)) tetra benzoic acid (H<sub>4</sub>L1).** To a CH<sub>2</sub>Cl<sub>2</sub> (DCM) solution (20 mL) of the compound 'Bu<sub>4</sub>L1 (1.10 g, 0.85 mmol), 10 mL trifluoroacetic acid (TFA) was added. The mixture solution was stirred at room temperature overnight, obtaining white precipitates. After filtration, DCM was removed under reduced pressure, and the obtained materials were dried at 100 °C overnight to afford the compound H<sub>4</sub>L1 (0.84 g, 0.79 mmol, yield 93%, became black before melting above 270 °C) as white solid. <sup>1</sup>H NMR (400MHz, DMSO-*d*<sub>6</sub>): 13.24 (s, 4H), 9.41 (s, 4H), 8.19 (d, *J* = 8.6 Hz, 8H), 8.12 (t, *J* = 8.6 Hz, 4H), 7.97 (d, *J* = 8.2 Hz, 8H), 7.49 (d, *J* = 8.2 Hz, 8H). <sup>13</sup>C NMR (400MHz, DMSO-*d*<sub>6</sub>): 166.9, 147.8, 146.8, 140.1, 131.7, 131.6, 131.2, 128.4, 125.7, 120.3, 120.2, 64.9. FTIR (KBr)  $\nu/\text{cm}^{-1}$ : 3456.4(s), 2924.1(m), 1703.1(s), 1608.6(s), 1558.5(w), 1518.0(w), 1491.0(w), 1444.7(w), 1408.0(m), 1313.5(w), 1230.6(s), 1172.7(w), 1118.7(w), 1051.2(m), 995.3(m), 858.3(w), 827.5(w), 796.6(m), 773.5(m), 692.4(w). ESI-TOF-HRMS: *m/z* calculated for Mr of C<sub>61</sub>H<sub>41</sub>N<sub>12</sub>O<sub>8</sub>: 1069.3170, found: 1069.3156[M + H]<sup>+</sup>.

**MOF 1.** Compound H<sub>4</sub>L1 (10 mg, 0.009 mmol) and Cu(NO<sub>3</sub>)<sub>2</sub>·2.5H<sub>2</sub>O (24 mg, 0.10 mmol) were dissolved in a *N,N'*-dimethylformamide (DMF, 10 mL) solution. Then, the mixture solution was placed in a tightly capped 20 mL vial after adding drops of nitric acid, which was heated in an oven at 80°C for 3 days. The blue block crystals were collected after cooling the sample down to room temperature. The crystals were washed by fresh DMF for three times and dried naturally at room temperature to yield **1** (Yield: 18.9 mg weighted after drying naturally).

**MOF 2.** Compound H<sub>4</sub>L1 (10 mg, 0.009 mmol) and Cu(NO<sub>3</sub>)<sub>2</sub>·2.5H<sub>2</sub>O (24 mg, 0.10 mmol) were dissolved in a solution consisting of DMF (8 mL), ethanol (1 mL) and H<sub>2</sub>O (1 mL). Then, the mixture solution was placed in a tightly capped 20 mL vial after adding drops of nitric acid, which was heated in an oven at 80°C for 3 days. The blue block crystals were collected after cooling the

sample down to room temperature. The crystals were washed by fresh DMF for three times and dried naturally at room temperature to yield **1** (Yield: 14.2 mg weighted after drying naturally).

**X-ray crystallography.** The single crystals of **1** and **2** suitable for X-ray analysis were picked up under a microscope from synthesized solution and then sealed in a glass tube immediately with DMF solvent and mounted. The diffraction data were collected at 293 K using graphite-monochromated Cu- $K\alpha$  radiation ( $\lambda = 1.54178$  Å) on a SuperNova X-ray Diffraction System from Agilent Technologies. Data reduction and empirical absorption correction were applied with CrysAlisPro.<sup>S4</sup> The structures were solved by the direct methods using the SHELXS program of the SHELXTL package and refined by full-matrix least-squares analyses on  $F^2$  (SHELXTL-2014).<sup>S5</sup> Metal atoms in each complex were located from the  $E$ -maps, and other non-hydrogen atoms were located in successive difference Fourier syntheses. The hydrogen atoms of the ligand were generated theoretically onto the specific atoms and refined isotropically with fixed thermal factors. It was impossible to see clear electron-density peaks in difference maps corresponding to acceptable locations for the H atoms bonded to the oxygen (O5) atoms of the coordinated water molecules in both structures. Thus, the refinements were completed by specifying the nearest Q peaks as H atoms and fixing these water H atoms in the right models. The isolated solvent molecules in the MOF are highly disordered and cannot be modeled, thus the SQUEEZE routine of PLATON was applied to remove the contributions of the solvent molecules to the scattering.<sup>S6</sup> Further details of crystallographic data and structural analysis are summarized in Table S1. CCDC 1523578 and 1523579 contain the supplementary crystallographic data for **1** and **2**, respectively. These data can be obtained free of charge from The Cambridge Crystallographic Data Centre via [www.ccdc.cam.ac.uk/data\\_request/cif](http://www.ccdc.cam.ac.uk/data_request/cif).

**Table S1.** Crystallographic data and structure refinement summary for MOFs **1** and **2**.

|                                                                | <b>1</b>                                                                                                                                                      | <b>2</b>                                                                                                                                                      |
|----------------------------------------------------------------|---------------------------------------------------------------------------------------------------------------------------------------------------------------|---------------------------------------------------------------------------------------------------------------------------------------------------------------|
| Formula after squeeze                                          | C <sub>61</sub> H <sub>40</sub> N <sub>12</sub> O <sub>10</sub> Cu <sub>2</sub>                                                                               | C <sub>61</sub> H <sub>40</sub> N <sub>12</sub> O <sub>10</sub> Cu <sub>2</sub>                                                                               |
| Formula with isolated solvents                                 | {Cu <sub>2</sub> (C <sub>57</sub> H <sub>36</sub> N <sub>12</sub> )(COO) <sub>4</sub> }(H <sub>2</sub> O) <sub>2</sub> ·22(C <sub>3</sub> H <sub>7</sub> NO)} | {Cu <sub>2</sub> ((C <sub>57</sub> H <sub>36</sub> N <sub>12</sub> )(COO) <sub>4</sub> )(H <sub>2</sub> O) <sub>2</sub> ·7(C <sub>3</sub> H <sub>7</sub> NO)} |
| Mr after squeeze                                               | 1228.13                                                                                                                                                       | 1228.13                                                                                                                                                       |
| Mr with isolated solvents                                      | 2836.11                                                                                                                                                       | 1739.76                                                                                                                                                       |
| Temperature (K)                                                | 293(3)                                                                                                                                                        | 293(3)                                                                                                                                                        |
| Wavelength                                                     | 1.54178 Å                                                                                                                                                     | 1.54178 Å                                                                                                                                                     |
| Crystal system                                                 | Tetragonal                                                                                                                                                    | Tetragonal                                                                                                                                                    |
| Space group                                                    | <i>P4<sub>2</sub>2<sub>1</sub>2</i>                                                                                                                           | <i>P4<sub>2</sub>2<sub>1</sub>2</i>                                                                                                                           |
| a,b,c / Å<br>$\alpha, \beta, \gamma / ^\circ$                  | a = 22.8050(5) Å,<br>c = 44.0727(12) Å                                                                                                                        | a = 16.0604(4) Å,<br>c = 44.1170(11) Å                                                                                                                        |
| V, Å <sup>3</sup>                                              | 22920.8(12)                                                                                                                                                   | 11379.3(5)                                                                                                                                                    |
| Z                                                              | 4                                                                                                                                                             | 4                                                                                                                                                             |
| F(000) after squeeze                                           | 2512                                                                                                                                                          | 2512                                                                                                                                                          |
| F(000) with isolated solvents                                  | 3391                                                                                                                                                          | 2794                                                                                                                                                          |
| D <sub>calc</sub> (g·cm <sup>-3</sup> )                        | 0.356                                                                                                                                                         | 0.717                                                                                                                                                         |
| D <sub>calc</sub> with isolated solvents (g·cm <sup>-3</sup> ) | 0.822                                                                                                                                                         | 1.016                                                                                                                                                         |
| Crystal size (mm)                                              | 0.166 × 0.148 × 0.144                                                                                                                                         | 0.182 × 0.112 × 0.106                                                                                                                                         |
| Theta range (deg)                                              | 3.40 to 73.33                                                                                                                                                 | 3.89 to 73.16                                                                                                                                                 |
| Reflections unique/collected                                   | 6222/30623                                                                                                                                                    | 5583/11062                                                                                                                                                    |
| Flack parameter                                                | 0.20(5)                                                                                                                                                       | 0.08(5)                                                                                                                                                       |
| R <sub>int</sub>                                               | 0.0935                                                                                                                                                        | 0.0361                                                                                                                                                        |
| Goodness-of-fit on F <sup>2</sup>                              | 1.074                                                                                                                                                         | 1.057                                                                                                                                                         |

## Figures

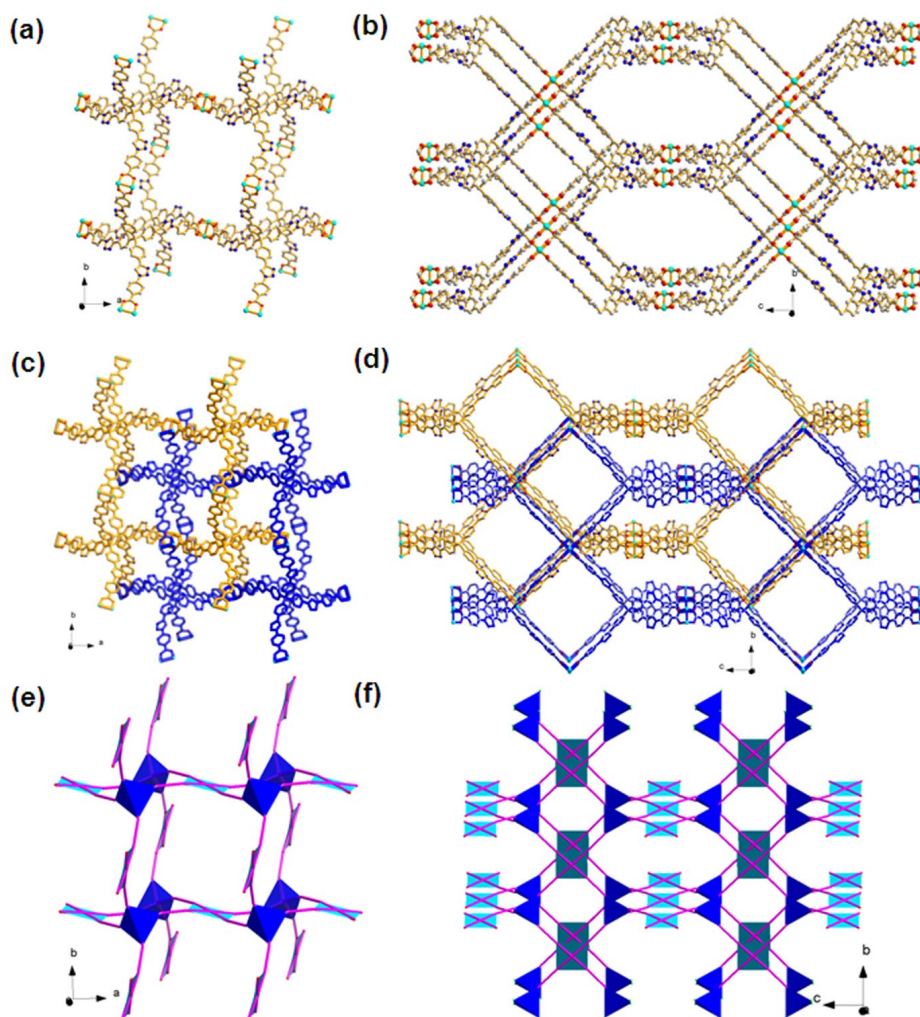

**Fig. S1.** Perspective view of basic 3D porous framework for **1** (a) along  $c$ -axis and (b) along  $a$ -axis; perspective view of 2-fold interpenetrated frameworks in **1** (c) along  $c$ -axis and (d) along  $a$ -axis; illustration of the “PtS”-type topological network of **1** showing the combination of planar tetratopic paddlewheel  $\text{Cu}_2$  clusters and tetrahedral tetratopic **L1** linkers.

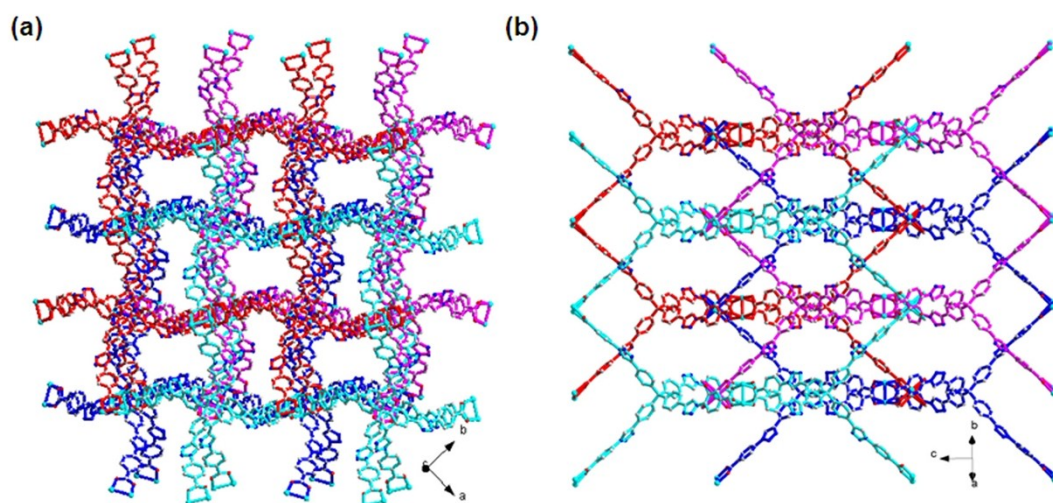

**Fig. S2.** Perspective view of 4-fold interpenetrated frameworks in **2** (a) along  $c$ -axis and (b) along (110)-axis.



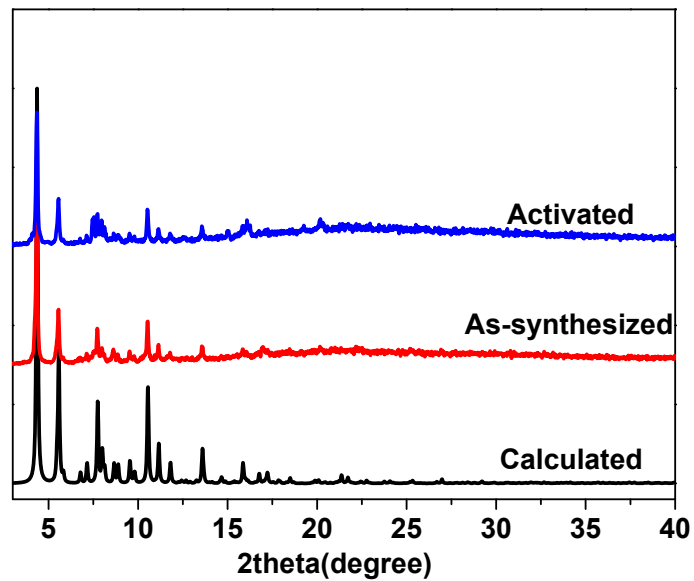

Fig. S3. PXRD patterns of **1**, indicating that the framework was retained after the activation process.

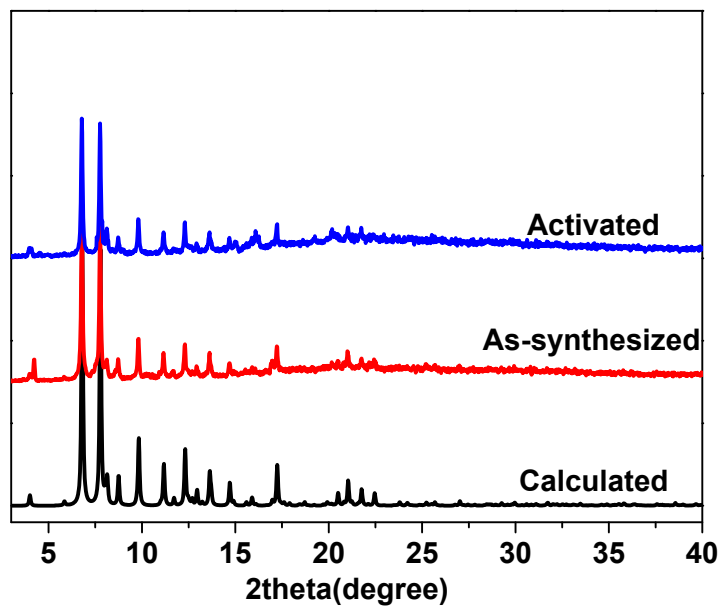

Fig. S4. PXRD patterns of **2**, indicating that the framework was retained after the activation process.

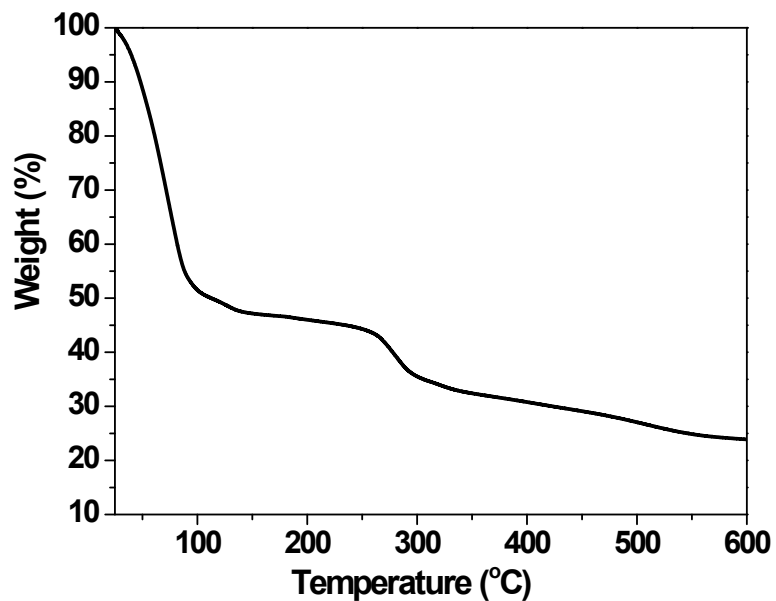

**Fig. S5.** TGA plot of as-synthesized **1**, indicating that the framework was stable up to ~260 °C. The initial sharp weight loss can be attributed to the weight loss of solvents (water and DMF) in pores of the framework.

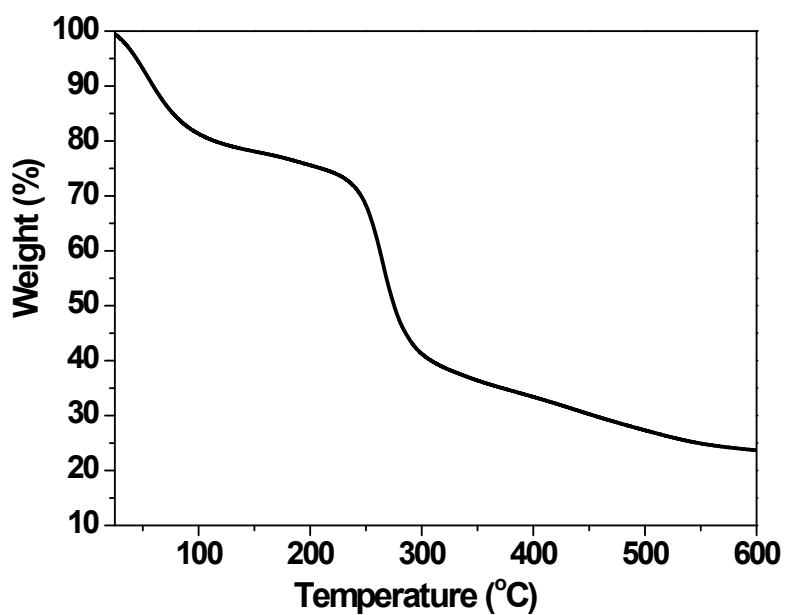

**Fig. S6.** TGA plot of as-synthesized **2**, indicating that the framework was stable up to ~250 °C. The initial sharp weight loss can be attributed to the weight loss of solvents (water and DMF) in pores of the framework.

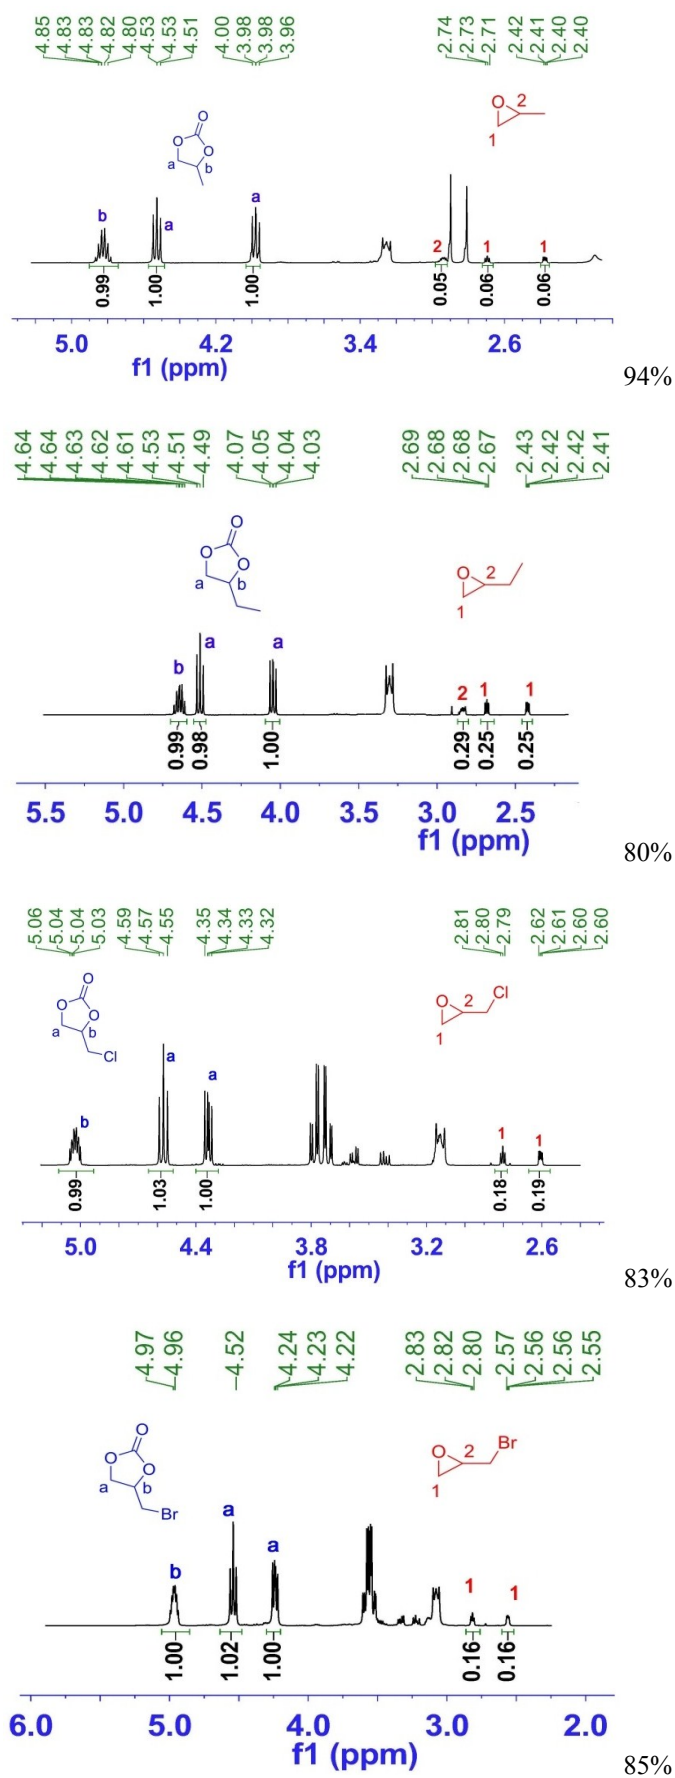

**Fig. S7.**  $^1\text{H}$  NMR spectra for the cyclic carbonates (with corresponding yield) produced from the  $\text{CO}_2$  cycloaddition with related epoxides catalyzed by **1**.

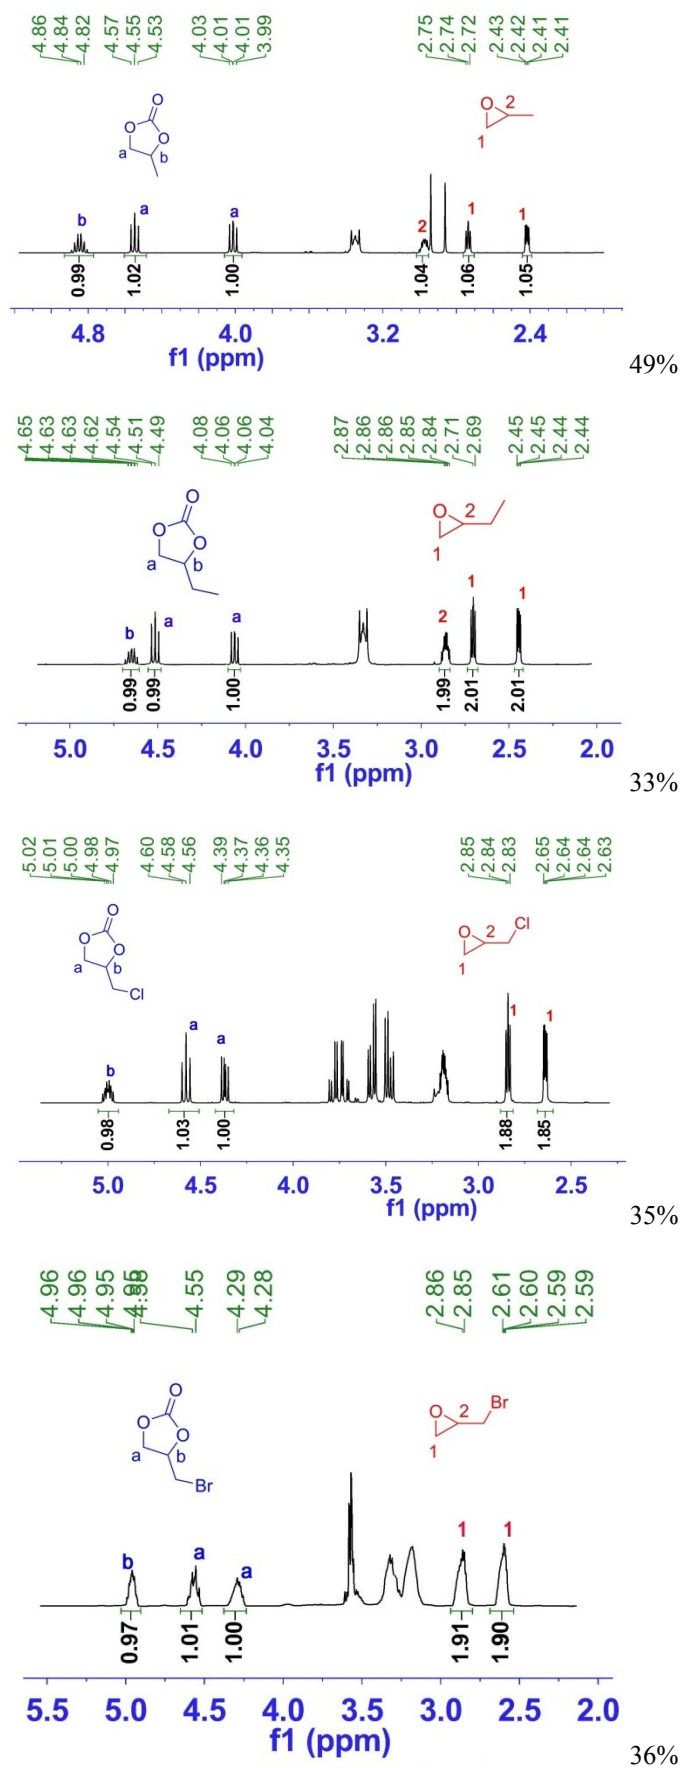

**Fig. S8.** <sup>1</sup>H NMR spectra for the cyclic carbonates (with corresponding yield) produced from the CO<sub>2</sub> cycloaddition with related epoxides catalyzed by **2**.

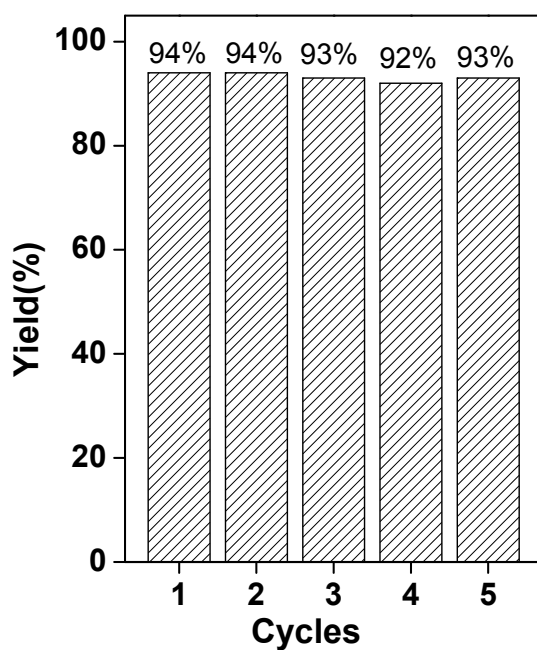

**Fig. S9.** Recyclability of **1** in five runs for catalytic CO<sub>2</sub> cycloaddition with propylene oxide to produce propylene carbonate.

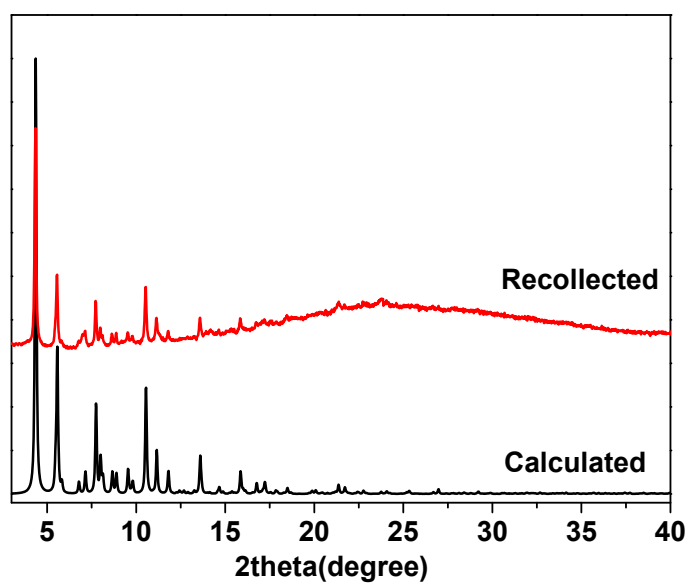

**Fig. S10.** PXRD patterns of **1** recollected after catalysis reactions and calculated from the crystal data, indicating that the framework was retained after the catalysis reactions.

### Characterization spectra

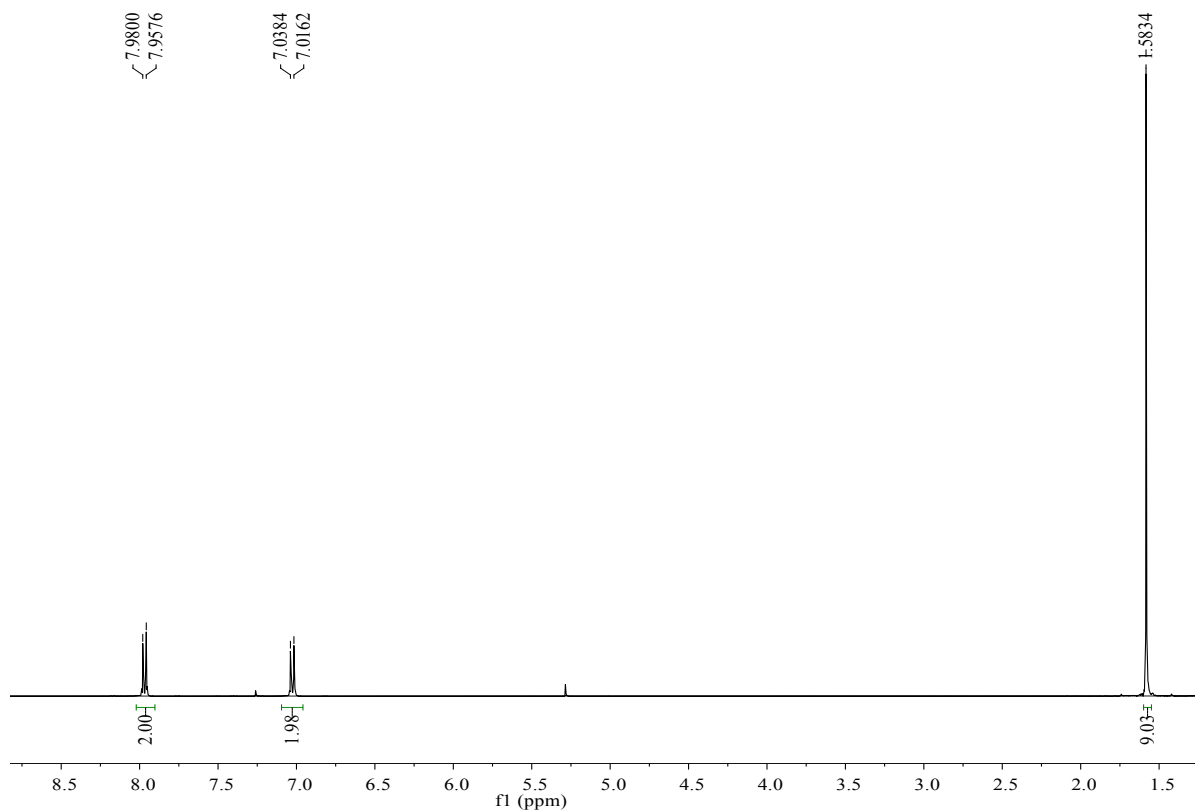

<sup>1</sup>H NMR spectrum of *tert*-butyl 4-azidobenzoate in CDCl<sub>3</sub> (trace DCM was observed).

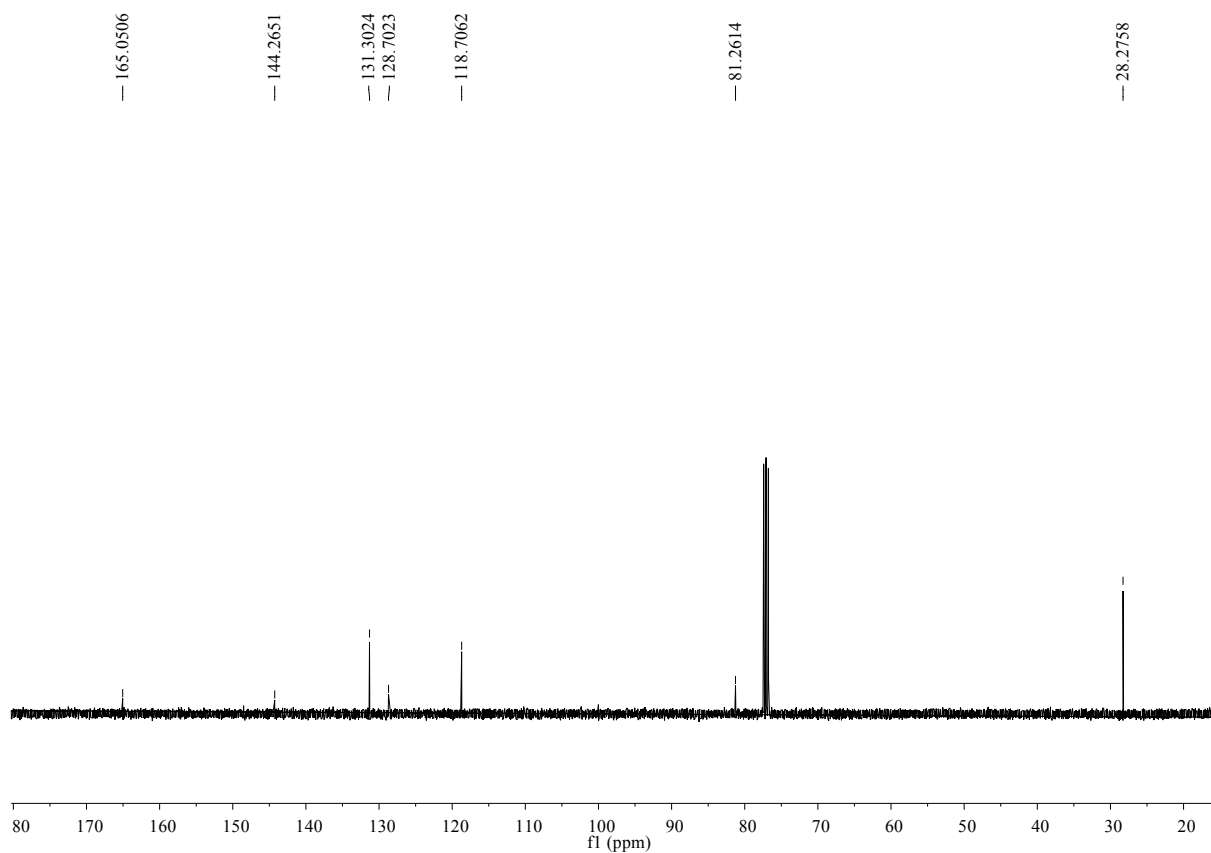

<sup>13</sup>C NMR spectrum of *tert*-butyl 4-azidobenzoate in CDCl<sub>3</sub>.

Single Mass Analysis

Tolerance = 10.0 PPM / DBE: min = -1.5, max = 50.0  
 Element prediction: Off  
 Number of isotope peaks used for i-FIT = 3

Monoisotopic Mass, Even Electron Ions  
 2 formula(e) evaluated with 1 results within limits (up to 50 best isotopic matches for each mass)

Elements Used:  
 C: 11-11 H: 12-15 N: 3-3 O: 2-2 Na: 0-1  
 C<sub>11</sub>H<sub>13</sub>N<sub>3</sub>O<sub>2</sub>  
 tBuLR 59 (1.311)

1: TOF MS ES+  
 2.03e+000

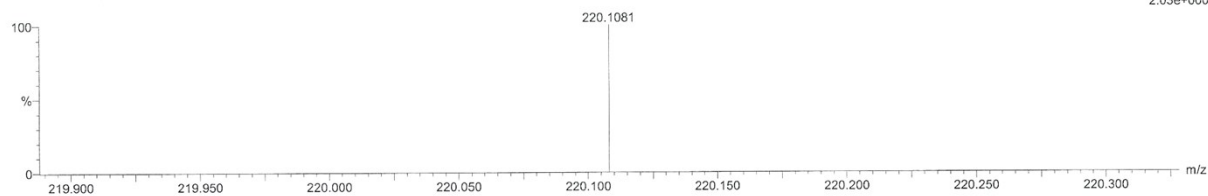

| Mass     | Calc. Mass | mDa  | PPM  | DBE | i-FIT | i-FIT (Norm) | Formula       |
|----------|------------|------|------|-----|-------|--------------|---------------|
| 220.1081 | 220.1086   | -0.5 | -2.3 | 6.5 | 12.0  | 0.0          | C11 H14 N3 O2 |

HRMS spectrum of *tert*-butyl 4-azidobenzoate

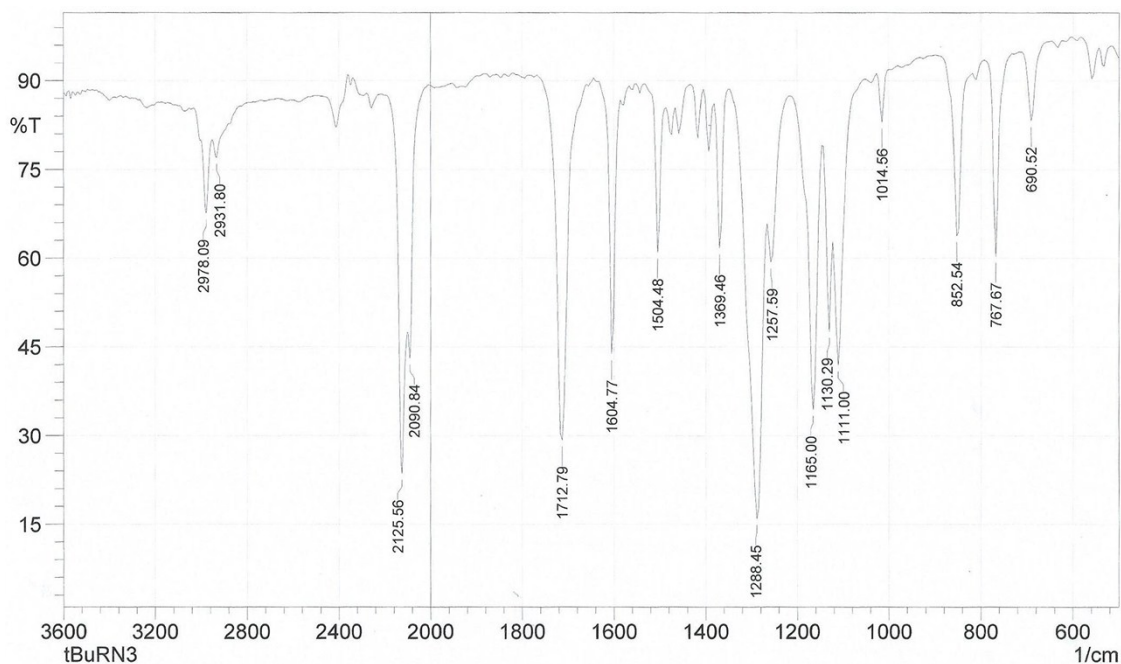

FT-IR spectrum of *tert*-butyl 4-azidobenzoate

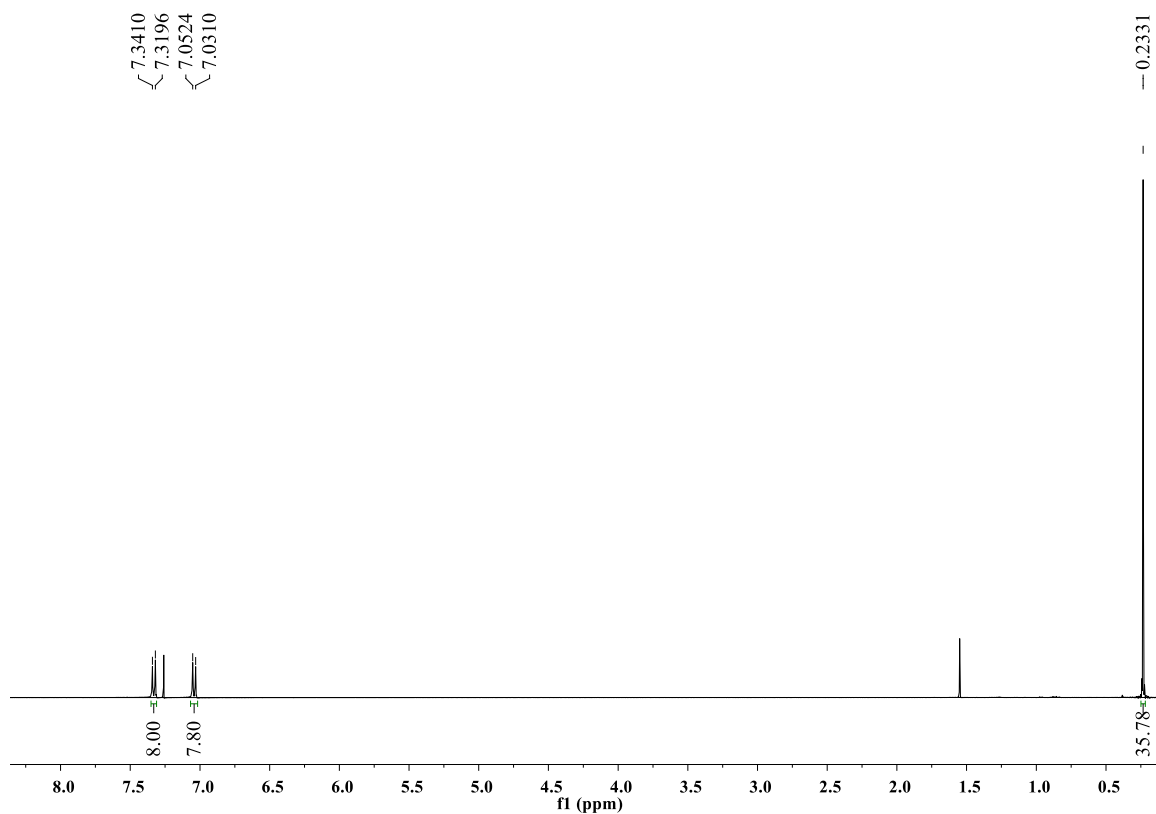

<sup>1</sup>H NMR spectrum of tetrakis(4((trimethylsilyl)ethynyl)phenyl)methane in CDCl<sub>3</sub>.

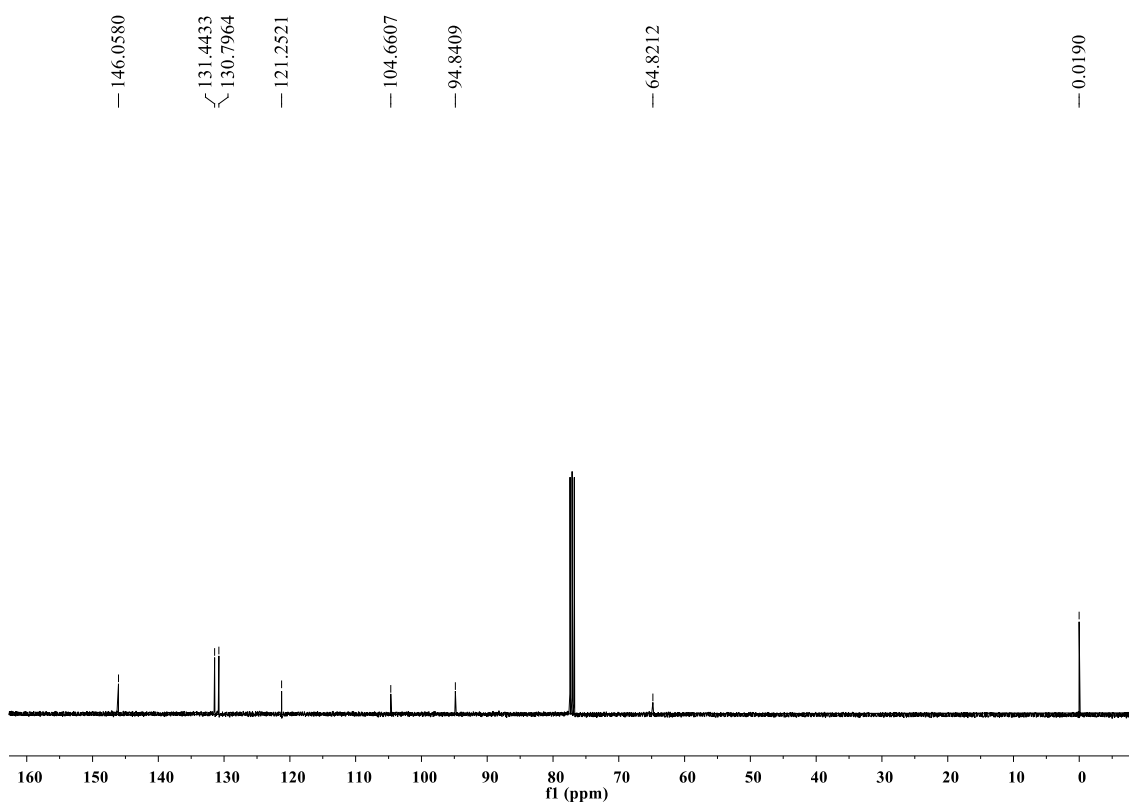

<sup>13</sup>C NMR spectrum of tetrakis(4((trimethylsilyl)ethynyl)phenyl)methane in CDCl<sub>3</sub>.



Elemental Composition Report

Single Mass Analysis

Tolerance = 20.0 PPM / DBE: min = -1.5, max = 50.0

Element prediction: Off

Number of isotope peaks used for i-FIT = 3

Monoisotopic Mass, Even Electron Ions

1 formula(e) evaluated with 1 results within limits (all results (up to 1000) for each mass)

Elements Used:

C: 45-45 H: 52-54 Si: 4-4

C<sub>45</sub>H<sub>52</sub>Si<sub>4</sub>

lpzT4Si 6 (0.138)

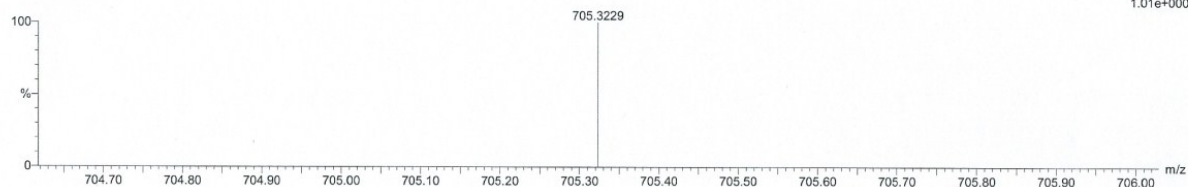

1: TOF MS ES+  
1.01e+000

Minimum:

Maximum: 5.0 20.0 -1.5 50.0

| Mass     | Calc. Mass | mDa | PPM | DBE  | i-FIT | i-FIT (Norm) | Formula                                         |
|----------|------------|-----|-----|------|-------|--------------|-------------------------------------------------|
| 705.3229 | 705.3224   | 0.5 | 0.7 | 23.5 | 12.2  | 0.0          | C <sub>45</sub> H <sub>53</sub> Si <sub>4</sub> |

HRMS spectrum of tetrakis(4((trimethylsilyl)ethynyl)phenyl)methane

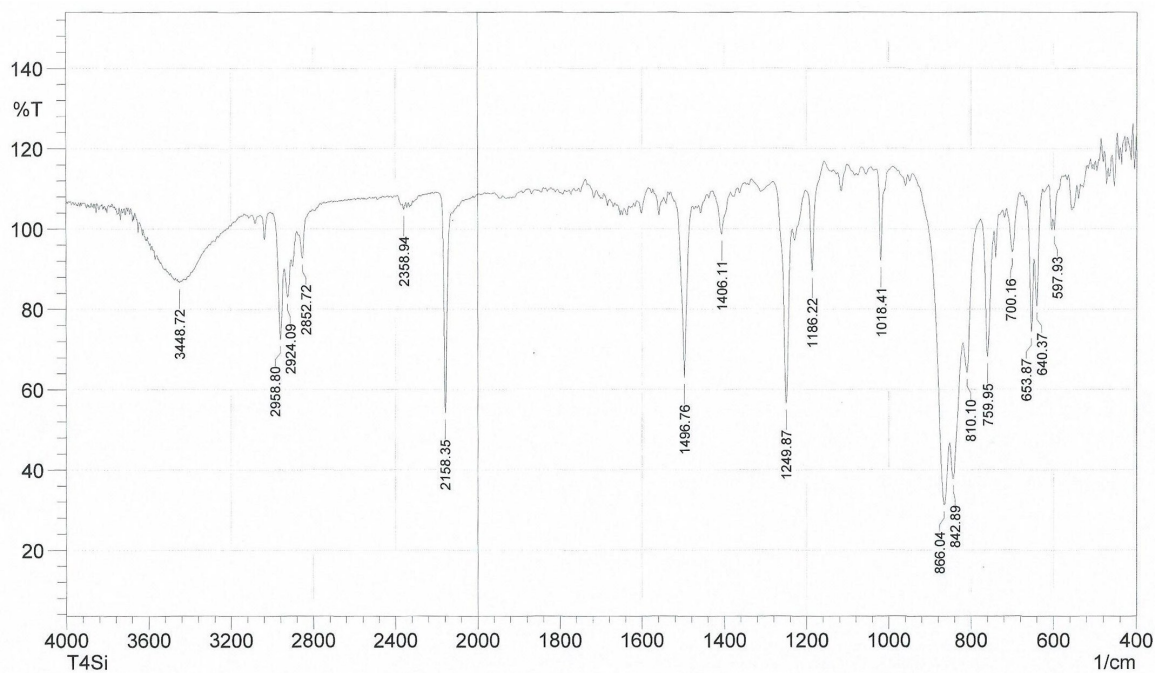

FT-IR spectrum of tetrakis(4((trimethylsilyl)ethynyl)phenyl)methane

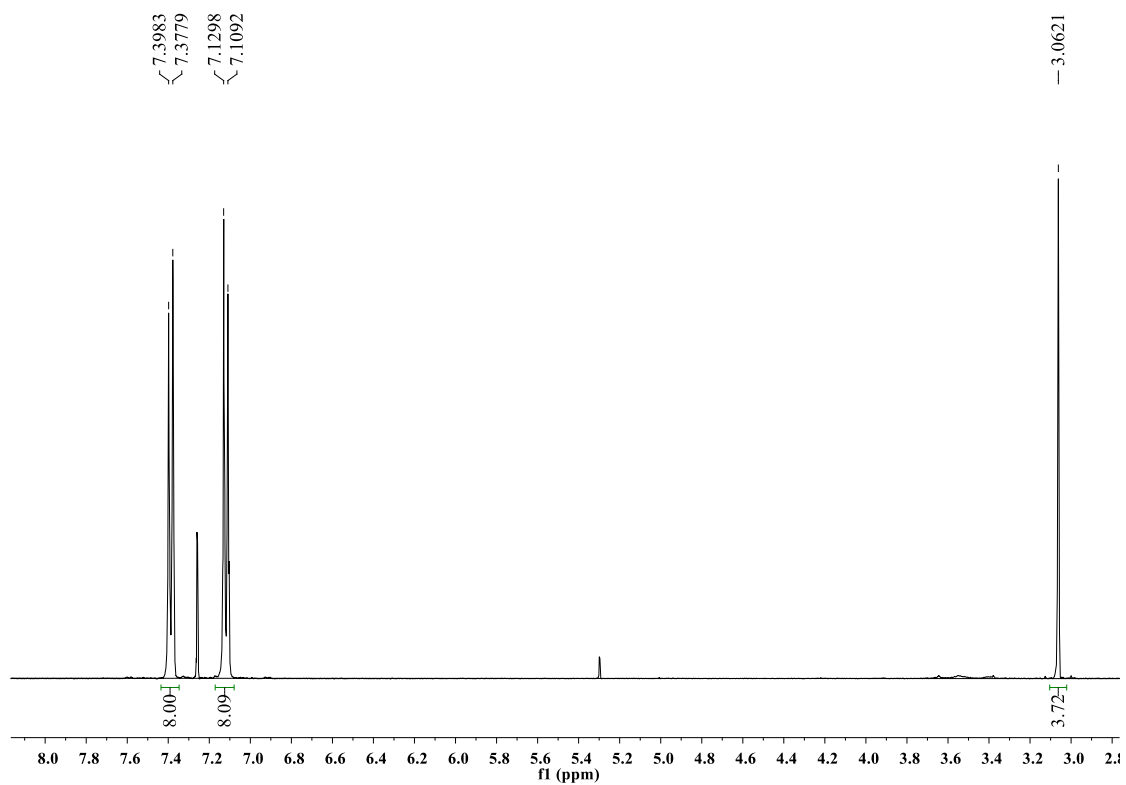

$^1\text{H}$  NMR spectrum of tetrakis(4-ethynylphenyl)methane in  $\text{CDCl}_3$  (trace DCM was observed).

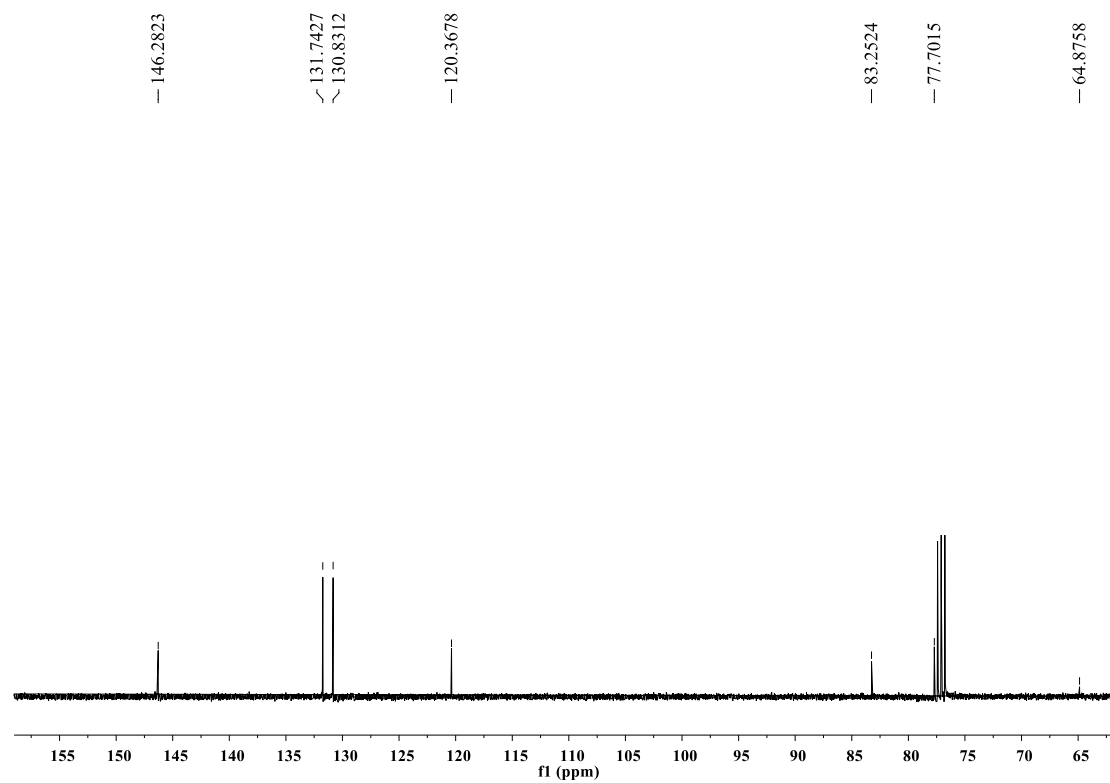

$^{13}\text{C}$  NMR spectrum of tetrakis(4-ethynylphenyl)methane in  $\text{CDCl}_3$

Elemental Composition Report

Single Mass Analysis

Tolerance = 20.0 PPM / DBE: min = -1.5, max = 50.0

Element prediction: Off

Number of isotope peaks used for i-FIT = 3

Monoisotopic Mass, Even Electron Ions

1 formula(e) evaluated with 1 results within limits (all results (up to 1000) for each mass)

Elements Used:

C: 33-33 H: 18-22

C33H20

lpzT4CC 4 (0.101)

1: TOF MS ES+  
3.04e+000

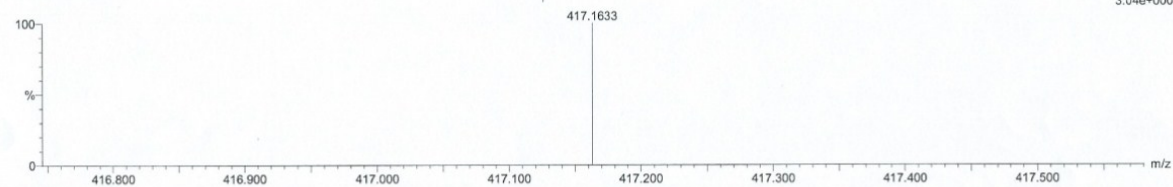

| Mass     | Calc. Mass | mDa  | PPM  | DBE  | i-FIT | i-FIT (Norm) | Formula |
|----------|------------|------|------|------|-------|--------------|---------|
| 417.1633 | 417.1643   | -1.0 | -2.4 | 23.5 | 11.5  | 0.0          | C33 H21 |

HRMS spectrum of tetrakis(4-ethynylphenyl)methane

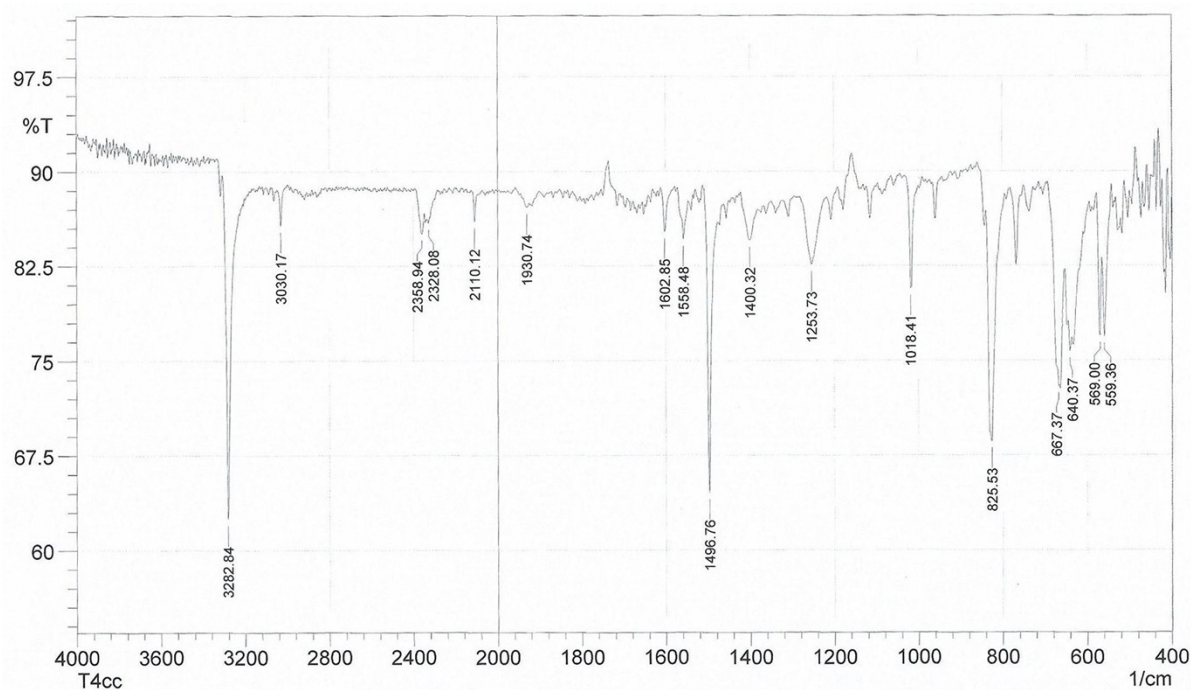

FT-IR spectrum of tetrakis(4-ethynylphenyl)methane

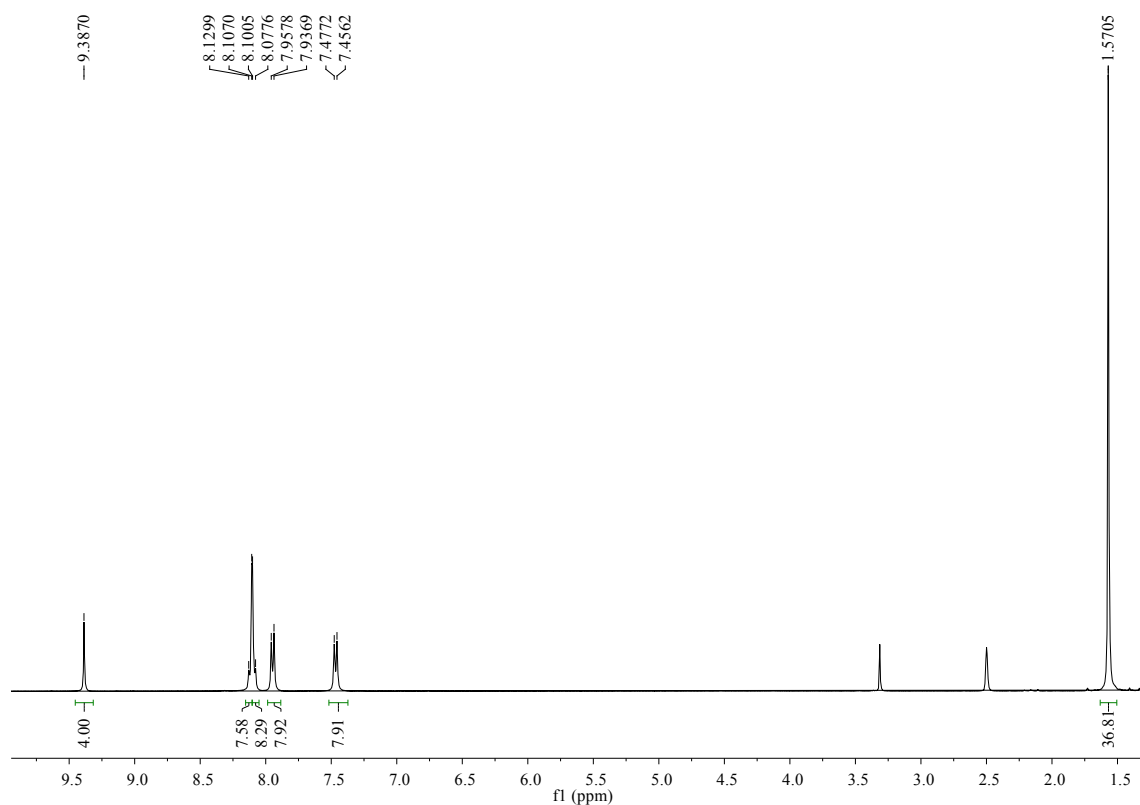

$^1\text{H}$  NMR spectrum of tetra-(*tert*-butyl) 4,4',4'',4'''-((methanetetrayltetrakis(benzene-4,1-diyl)) tetrakis (1*H*- 1,2,3-triazole-4,1-diyl))tetrabenzoate in  $\text{DMSO-}d_6$ .

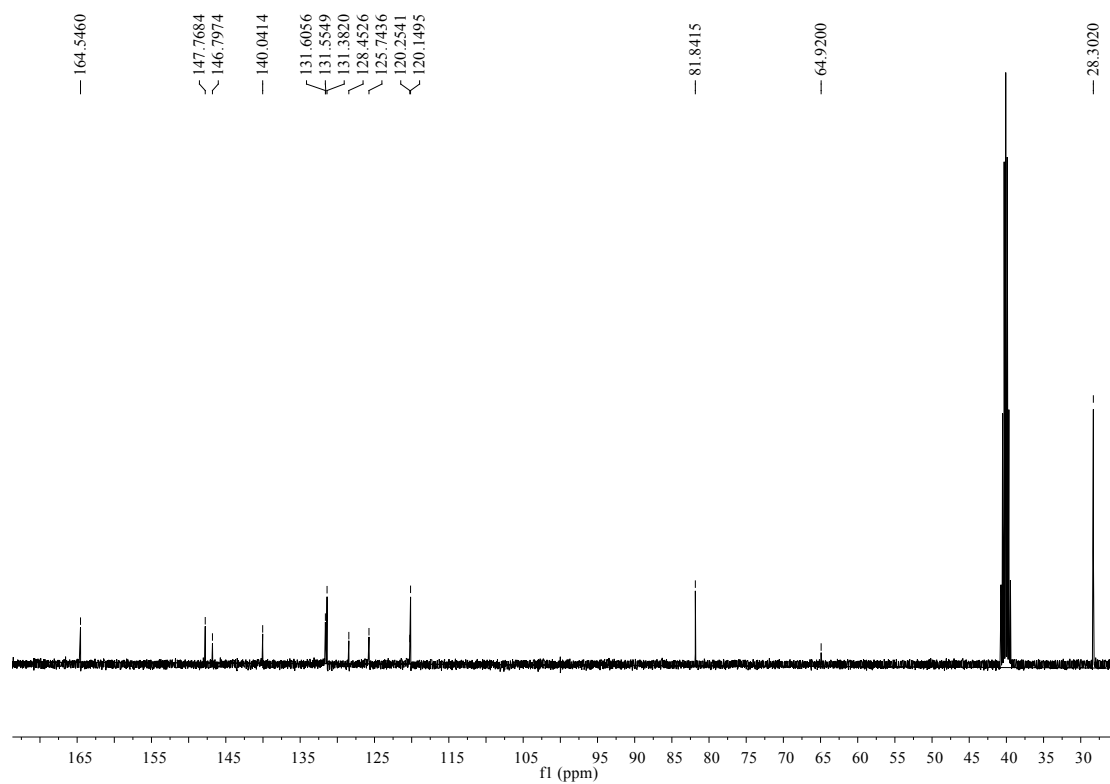

$^{13}\text{C}$  NMR spectrum of tetra-(*tert*-butyl) 4,4',4'',4'''-((methanetetrayltetrakis(benzene-4,1-diyl)) tetrakis (1*H*- 1,2,3-triazole-4,1-diyl))tetrabenzoate in  $\text{DMSO-}d_6$ .

Elemental Composition Report

Single Mass Analysis

Tolerance = 10.0 PPM / DBE: min = -1.5, max = 50.0  
 Element prediction: Off  
 Number of isotope peaks used for i-FIT = 2

Monoisotopic Mass, Even Electron Ions  
 1 formula(e) evaluated with 1 results within limits (up to 50 closest results for each mass)

Elements Used:  
 C: 76-78 H: 70-75 N: 12-12 O: 6-9  
 C77H72N12O8  
 Ipz-1 11 (0.258)

1: TOF MS ES+  
 5.06e+000

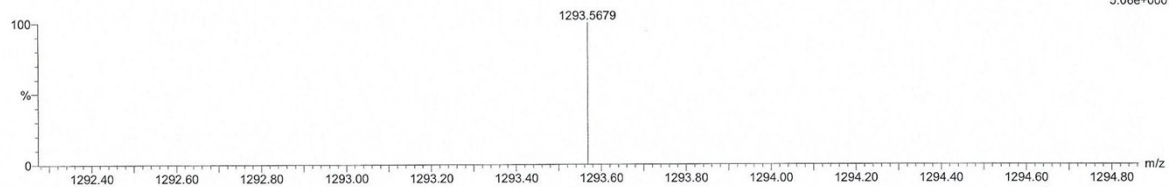

| Mass      | Calc. Mass | mDa | PPM | DBE  | i-FIT | i-FIT (Norm) | Formula        |
|-----------|------------|-----|-----|------|-------|--------------|----------------|
| 1293.5679 | 1293.5674  | 0.5 | 0.4 | 47.5 | 13.2  | 0.0          | C77 H73 N12 O8 |

HR-MS spectrum of tetra-(*tert*-butyl) 4,4',4'',4'''-((methanetetrayltetrakis(benzene-4,1-diyl)) tetrakis (1*H*- 1,2,3-triazole-4,1-diyl))tetrabenzoate.

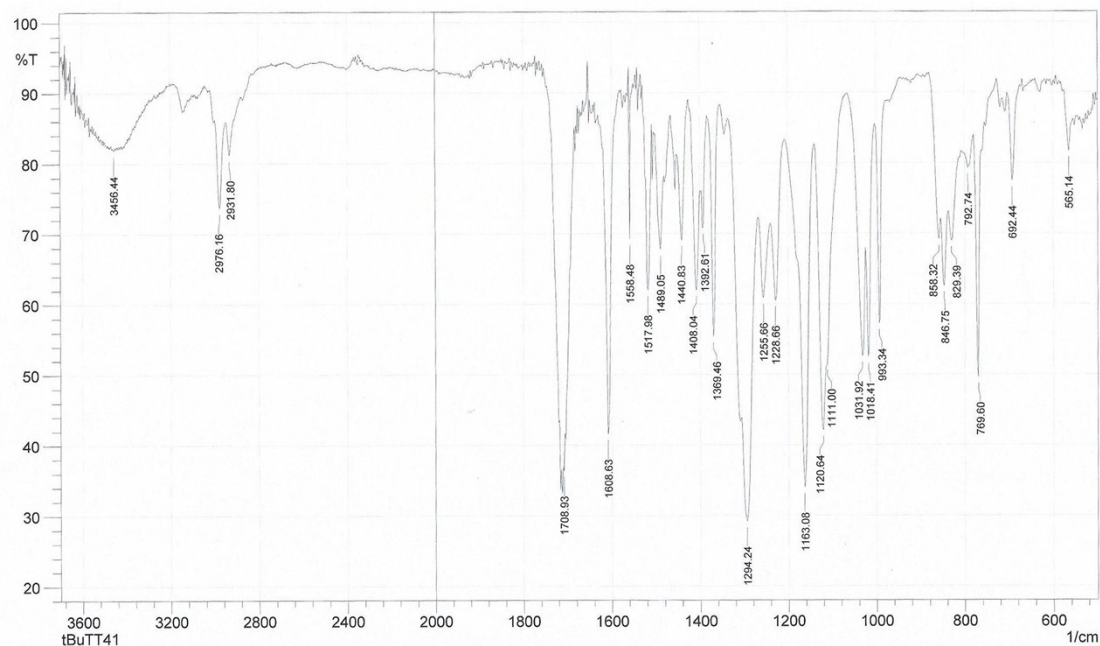

FT-IR spectrum of tetra-(*tert*-butyl) 4,4',4'',4'''-((methanetetrayltetrakis(benzene-4,1-diyl)) tetrakis (1*H*- 1,2,3-triazole-4,1-diyl))tetrabenzoate.

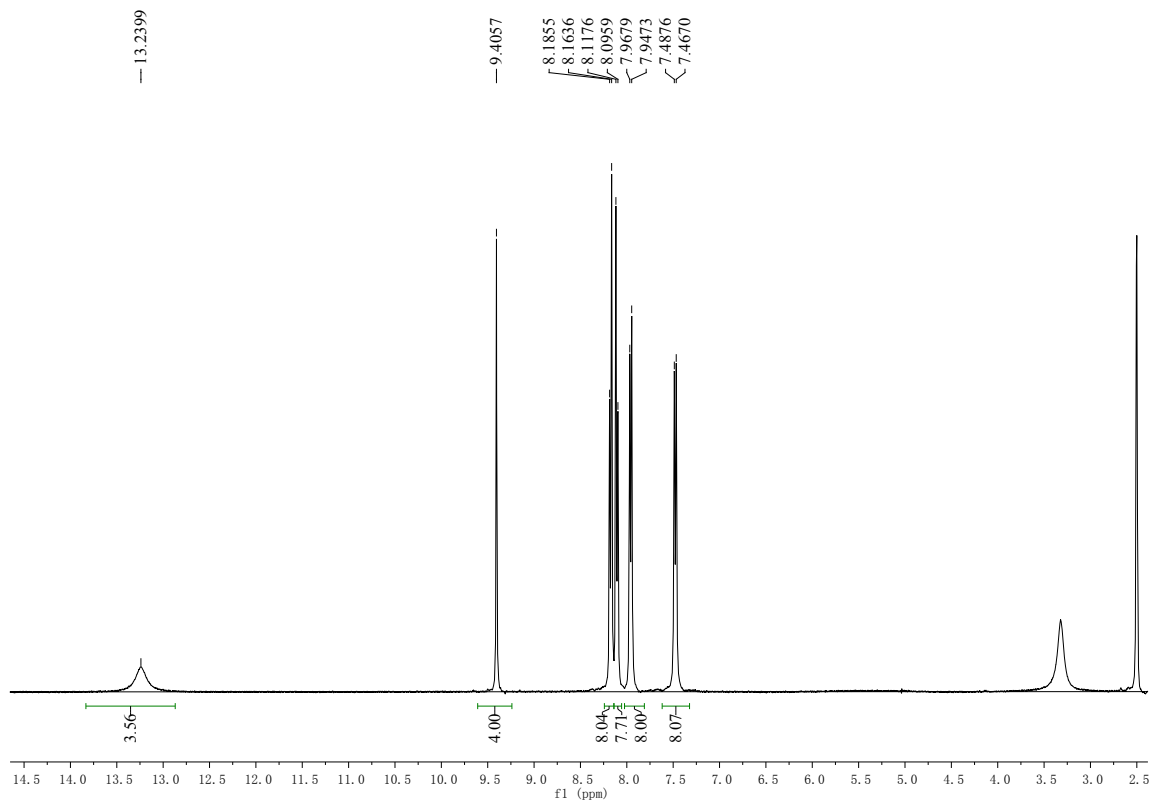

$^1\text{H}$  NMR spectrum of 4,4',4'',4'''-((Methanetetrayltetrakis(benzene-4,1-diyl)) tetrakis (1H-1,2,3-tri-azole-4,1-diyl))tetrabenzoic acid in  $\text{DMSO-}d_6$ .

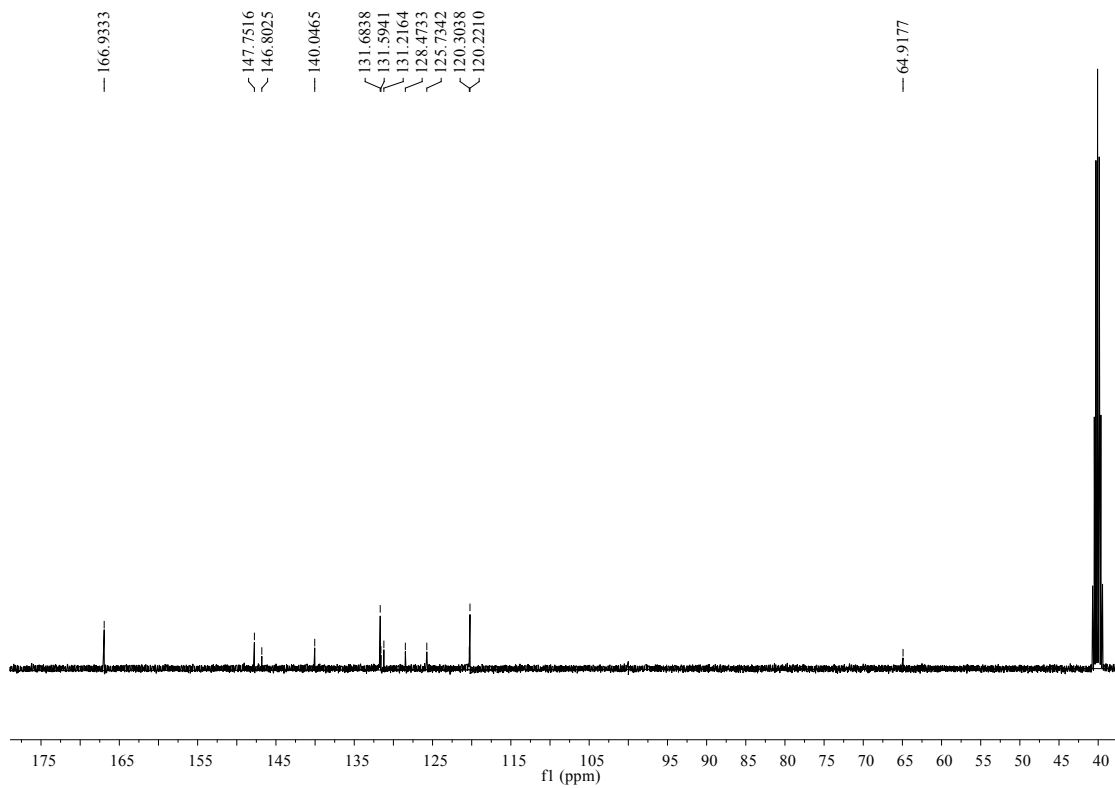

$^{13}\text{C}$  NMR spectrum of 4,4',4'',4'''-((Methanetetrayltetrakis(benzene-4,1-diyl)) tetrakis (1H-1,2,3-tri-azole-4,1-diyl))tetrabenzoic acid in  $\text{DMSO-}d_6$ .

Elemental Composition Report

Single Mass Analysis

Tolerance = 10.0 PPM / DBE: min = -1.5, max = 50.0  
 Element prediction: Off  
 Number of isotope peaks used for i-FIT = 2

Monoisotopic Mass, Even Electron Ions

1 formula(e) evaluated with 1 results within limits (up to 50 closest results for each mass)

Elements Used:

C: 61-61 H: 40-42 N: 12-12 O: 6-9

C77H72N12O8

lpz-1 17 (0.397)

1: TOF MS ES+  
1.01e+000

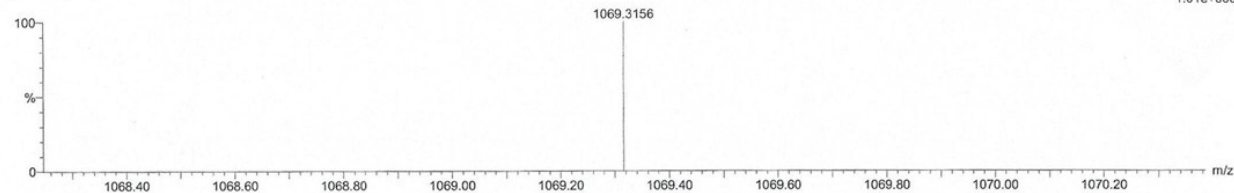

Minimum: -1.5  
 Maximum: 5.0 10.0 50.0

| Mass      | Calc. Mass | mDa  | PPM  | DBE  | i-FIT | i-FIT (Norm) | Formula        |
|-----------|------------|------|------|------|-------|--------------|----------------|
| 1069.3156 | 1069.3170  | -1.4 | -1.3 | 47.5 | 12.1  | 0.0          | C61 H41 N12 O8 |

HR-MS spectrum of 4,4',4'',4'''-((Methanetetrayltetrakis(benzene-4,1-diyl)) tetrakis (1*H*-1,2,3-tri-azole-4,1-diyl))tetrabenzoic acid.

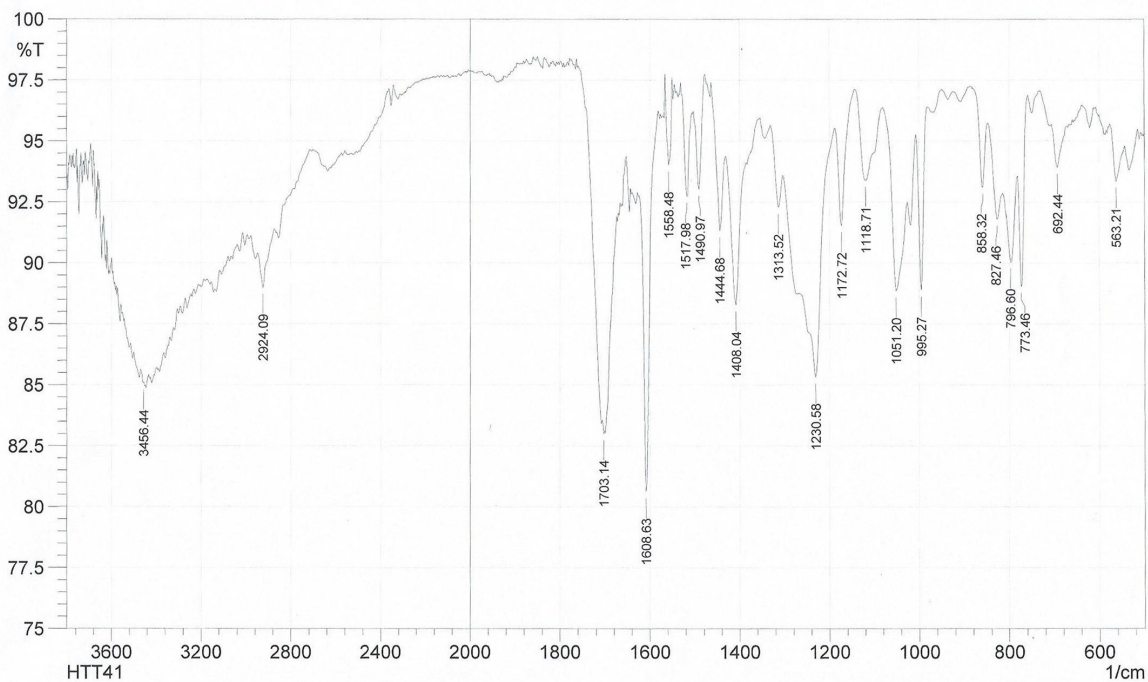

FT-IR spectrum of 4,4',4'',4'''-((Methanetetrayltetrakis(benzene-4,1-diyl)) tetrakis (1*H*-1,2,3-tri-azole-4,1-diyl))tetrabenzoic acid.

## References

- S1. P.-Z. Li, X.-J. Wang, S. Y. Tan, C. Y. Ang, H.-Z. Chen, J. Liu, R.-Q. Zou and Y. Zhao, *Angew. Chem. Int. Ed.*, 2015, **54**, 12748.
- S2. P.-Z. Li, X.-J. Wang, J. Liu, J. S. Lim, R. Zou and Y. Zhao, *J. Am. Chem. Soc.*, 2016, **138**, 2142.
- S3. O. Plietzsch, C. I. Schilling, M. Tolev, M. Nieger, C. Richert, T. Muller and S. Brase, *Org. Biomol. Chem.*, 2009, **7**, 4734.
- S4. CrysAlisPro, Agilent Technologies, Version 1.171.36.28 (release 01-02-2013 CrysAlis171 .NET).
- S5. G. M. Sheldrick, *Acta Cryst.*, 2015, **C71**, 3-8.
- S6. A. L. Spek, *Acta Cryst.*, 2015, **C71**, 9-18.
